# Supplementary material for: Blood oxygen level dependent magnetic resonance imaging for detecting pathological patterns in lupus nephritis patients: a preliminary study using a decision tree model
Source: Springer Nature journal article supplement (doi:10.1186/s12882-017-0787-z), 2018-02-09
Supplement: MOESM2 [file 15455132]

| Node 0       |              |             |
|--------------|--------------|-------------|
| Category     | %            | n           |
| III          | 41.7         | 1500        |
| IV           | 58.3         | 2100        |
| <b>Total</b> | <b>100.0</b> | <b>3600</b> |

**Harmonic Mean**  
Adj. P =0.000, Chi-square=239.055, df=6

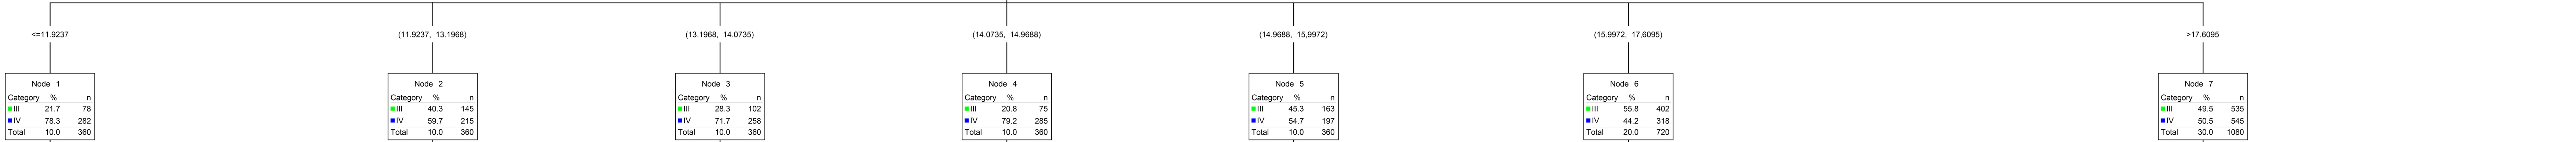

| Node 1       |             |            |
|--------------|-------------|------------|
| Category     | %           | n          |
| III          | 21.7        | 78         |
| IV           | 78.3        | 282        |
| <b>Total</b> | <b>10.0</b> | <b>360</b> |

| Node 2       |             |            |
|--------------|-------------|------------|
| Category     | %           | n          |
| III          | 40.3        | 145        |
| IV           | 59.7        | 215        |
| <b>Total</b> | <b>10.0</b> | <b>360</b> |

| Node 3       |             |            |
|--------------|-------------|------------|
| Category     | %           | n          |
| III          | 28.3        | 102        |
| IV           | 71.7        | 258        |
| <b>Total</b> | <b>10.0</b> | <b>360</b> |

| Node 4       |             |            |
|--------------|-------------|------------|
| Category     | %           | n          |
| III          | 20.8        | 75         |
| IV           | 79.2        | 285        |
| <b>Total</b> | <b>10.0</b> | <b>360</b> |

| Node 5       |             |            |
|--------------|-------------|------------|
| Category     | %           | n          |
| III          | 45.3        | 163        |
| IV           | 54.7        | 197        |
| <b>Total</b> | <b>10.0</b> | <b>360</b> |

| Node 6       |             |            |
|--------------|-------------|------------|
| Category     | %           | n          |
| III          | 55.8        | 402        |
| IV           | 44.2        | 318        |
| <b>Total</b> | <b>20.0</b> | <b>720</b> |

| Node 7       |             |             |
|--------------|-------------|-------------|
| Category     | %           | n           |
| III          | 49.5        | 535         |
| IV           | 50.5        | 545         |
| <b>Total</b> | <b>30.0</b> | <b>1080</b> |

**Quartile**  
Adj. P =0.000, Chi-square=64.431, df=4

**Standard Deviation**  
Adj. P =0.000, Chi-square=52.962, df=2

**Range**  
Adj. P =0.000, Chi-square=42.833, df=2

**Kurtosis**  
Adj. P =0.000, Chi-square=27.701, df=2

**Range**  
Adj. P =0.000, Chi-square=33.790, df=2

**Standard Deviation**  
Adj. P =0.000, Chi-square=83.798, df=3

**Range**  
Adj. P =0.000, Chi-square=64.937, df=4

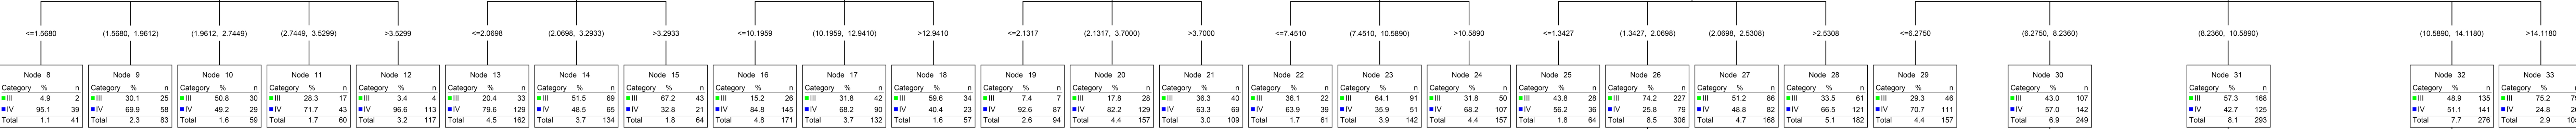

| Node 8       |            |           |
|--------------|------------|-----------|
| Category     | %          | n         |
| III          | 4.9        | 2         |
| IV           | 95.1       | 39        |
| <b>Total</b> | <b>1.1</b> | <b>41</b> |

| Node 9       |            |           |
|--------------|------------|-----------|
| Category     | %          | n         |
| III          | 30.1       | 25        |
| IV           | 69.9       | 58        |
| <b>Total</b> | <b>2.3</b> | <b>83</b> |

| Node 10      |            |           |
|--------------|------------|-----------|
| Category     | %          | n         |
| III          | 50.8       | 30        |
| IV           | 49.2       | 29        |
| <b>Total</b> | <b>1.6</b> | <b>59</b> |

| Node 11      |            |           |
|--------------|------------|-----------|
| Category     | %          | n         |
| III          | 28.3       | 17        |
| IV           | 71.7       | 43        |
| <b>Total</b> | <b>1.7</b> | <b>60</b> |

| Node 12      |            |            |
|--------------|------------|------------|
| Category     | %          | n          |
| III          | 3.4        | 4          |
| IV           | 96.6       | 113        |
| <b>Total</b> | <b>3.2</b> | <b>117</b> |

| Node 13      |            |            |
|--------------|------------|------------|
| Category     | %          | n          |
| III          | 20.4       | 33         |
| IV           | 79.6       | 129        |
| <b>Total</b> | <b>4.5</b> | <b>162</b> |

| Node 14      |            |            |
|--------------|------------|------------|
| Category     | %          | n          |
| III          | 51.5       | 69         |
| IV           | 48.5       | 65         |
| <b>Total</b> | <b>3.7</b> | <b>134</b> |

| Node 15      |            |           |
|--------------|------------|-----------|
| Category     | %          | n         |
| III          | 67.2       | 43        |
| IV           | 32.8       | 21        |
| <b>Total</b> | <b>1.8</b> | <b>64</b> |

| Node 16      |            |            |
|--------------|------------|------------|
| Category     | %          | n          |
| III          | 15.2       | 26         |
| IV           | 84.8       | 145        |
| <b>Total</b> | <b>4.8</b> | <b>171</b> |

| Node 17      |            |            |
|--------------|------------|------------|
| Category     | %          | n          |
| III          | 31.8       | 42         |
| IV           | 68.2       | 90         |
| <b>Total</b> | <b>3.7</b> | <b>132</b> |

| Node 18      |            |           |
|--------------|------------|-----------|
| Category     | %          | n         |
| III          | 59.6       | 34        |
| IV           | 40.4       | 23        |
| <b>Total</b> | <b>1.6</b> | <b>57</b> |

| Node 19      |            |           |
|--------------|------------|-----------|
| Category     | %          | n         |
| III          | 7.4        | 7         |
| IV           | 92.6       | 87        |
| <b>Total</b> | <b>2.6</b> | <b>94</b> |

| Node 20      |            |            |
|--------------|------------|------------|
| Category     | %          | n          |
| III          | 17.8       | 28         |
| IV           | 82.2       | 129        |
| <b>Total</b> | <b>4.4</b> | <b>157</b> |

| Node 21      |            |            |
|--------------|------------|------------|
| Category     | %          | n          |
| III          | 36.3       | 40         |
| IV           | 63.3       | 69         |
| <b>Total</b> | <b>3.0</b> | <b>109</b> |

| Node 22      |            |           |
|--------------|------------|-----------|
| Category     | %          | n         |
| III          | 36.1       | 22        |
| IV           | 63.9       | 39        |
| <b>Total</b> | <b>1.7</b> | <b>61</b> |

| Node 23      |            |            |
|--------------|------------|------------|
| Category     | %          | n          |
| III          | 64.1       | 91         |
| IV           | 35.9       | 51         |
| <b>Total</b> | <b>3.9</b> | <b>142</b> |

| Node 24      |            |            |
|--------------|------------|------------|
| Category     | %          | n          |
| III          | 31.8       | 50         |
| IV           | 68.2       | 107        |
| <b>Total</b> | <b>4.4</b> | <b>157</b> |

| Node 25      |            |           |
|--------------|------------|-----------|
| Category     | %          | n         |
| III          | 43.8       | 28        |
| IV           | 56.2       | 36        |
| <b>Total</b> | <b>1.8</b> | <b>64</b> |

| Node 26      |            |            |
|--------------|------------|------------|
| Category     | %          | n          |
| III          | 74.2       | 227        |
| IV           | 25.8       | 79         |
| <b>Total</b> | <b>8.5</b> | <b>306</b> |

| Node 27      |            |            |
|--------------|------------|------------|
| Category     | %          | n          |
| III          | 51.2       | 86         |
| IV           | 48.8       | 82         |
| <b>Total</b> | <b>4.7</b> | <b>168</b> |

| Node 28      |            |            |
|--------------|------------|------------|
| Category     | %          | n          |
| III          | 33.5       | 61         |
| IV           | 66.5       | 121        |
| <b>Total</b> | <b>5.1</b> | <b>182</b> |

| Node 29      |            |            |
|--------------|------------|------------|
| Category     | %          | n          |
| III          | 29.3       | 46         |
| IV           | 70.7       | 111        |
| <b>Total</b> | <b>4.4</b> | <b>157</b> |

**Range**  
Adj. P =0.006, Chi-square=11.376, df=1

**Harmonic Mean**  
Adj. P =0.008, Chi-square=8.209, df=1

**Harmonic Mean**  
Adj. P =0.000, Chi-square=35.972, df=1

**Geometric Mean**  
Adj. P =0.000, Chi-square=35.016, df=2

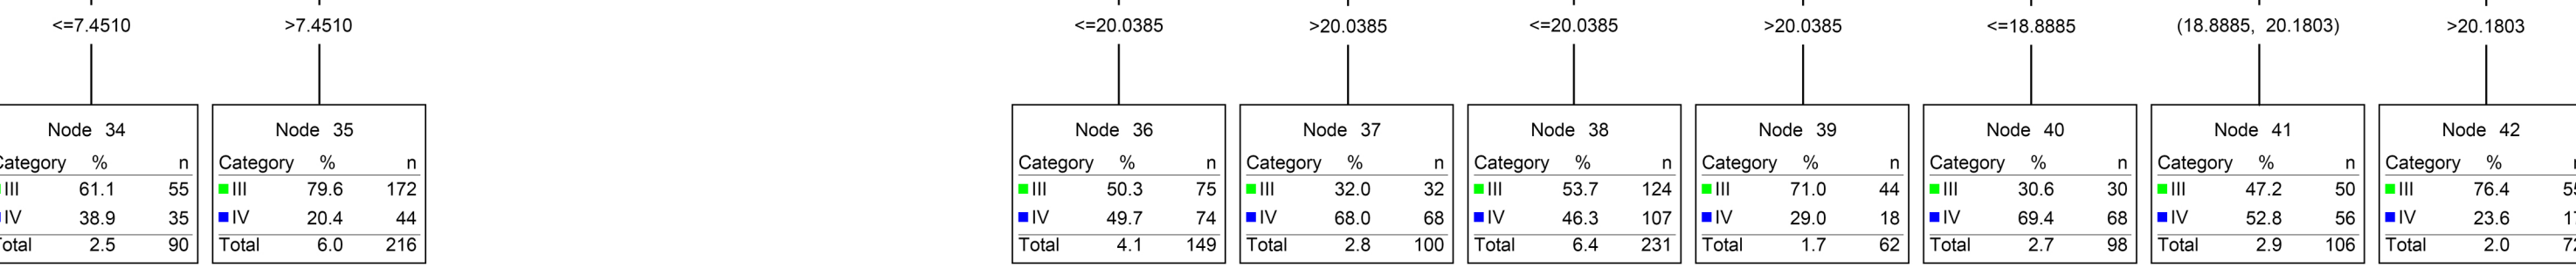

| Node 34      |            |           |
|--------------|------------|-----------|
| Category     | %          | n         |
| III          | 61.1       | 55        |
| IV           | 38.9       | 35        |
| <b>Total</b> | <b>2.5</b> | <b>90</b> |

| Node 35      |            |            |
|--------------|------------|------------|
| Category     | %          | n          |
| III          | 79.6       | 172        |
| IV           | 20.4       | 44         |
| <b>Total</b> | <b>6.0</b> | <b>216</b> |

| Node 36      |            |            |
|--------------|------------|------------|
| Category     | %          | n          |
| III          | 50.3       | 75         |
| IV           | 49.7       | 74         |
| <b>Total</b> | <b>4.1</b> | <b>149</b> |

| Node 37      |            |            |
|--------------|------------|------------|
| Category     | %          | n          |
| III          | 32.0       | 32         |
| IV           | 68.0       | 68         |
| <b>Total</b> | <b>2.8</b> | <b>100</b> |

| Node 38      |            |            |
|--------------|------------|------------|
| Category     | %          | n          |
| III          | 53.7       | 124        |
| IV           | 46.3       | 107        |
| <b>Total</b> | <b>6.4</b> | <b>231</b> |

| Node 39      |            |           |
|--------------|------------|-----------|
| Category     | %          | n         |
| III          | 71.0       | 44        |
| IV           | 29.0       | 18        |
| <b>Total</b> | <b>1.7</b> | <b>62</b> |

| Node 40      |            |           |
|--------------|------------|-----------|
| Category     | %          | n         |
| III          | 30.6       | 30        |
| IV           | 69.4       | 68        |
| <b>Total</b> | <b>2.7</b> | <b>98</b> |

| Node 41      |            |            |
|--------------|------------|------------|
| Category     | %          | n          |
| III          | 47.2       | 50         |
| IV           | 52.8       | 56         |
| <b>Total</b> | <b>2.9</b> | <b>106</b> |

| Node 42      |            |           |
|--------------|------------|-----------|
| Category     | %          | n         |
| III          | 76.4       | 55        |
| IV           | 23.6       | 17        |
| <b>Total</b> | <b>2.0</b> | <b>72</b> |
