# Supplementary material for: Blood oxygen level dependent magnetic resonance imaging for detecting pathological patterns in lupus nephritis patients: a preliminary study using a decision tree model
Source: Springer Nature journal article supplement (doi:10.1186/s12882-017-0787-z), 2018-02-09

a

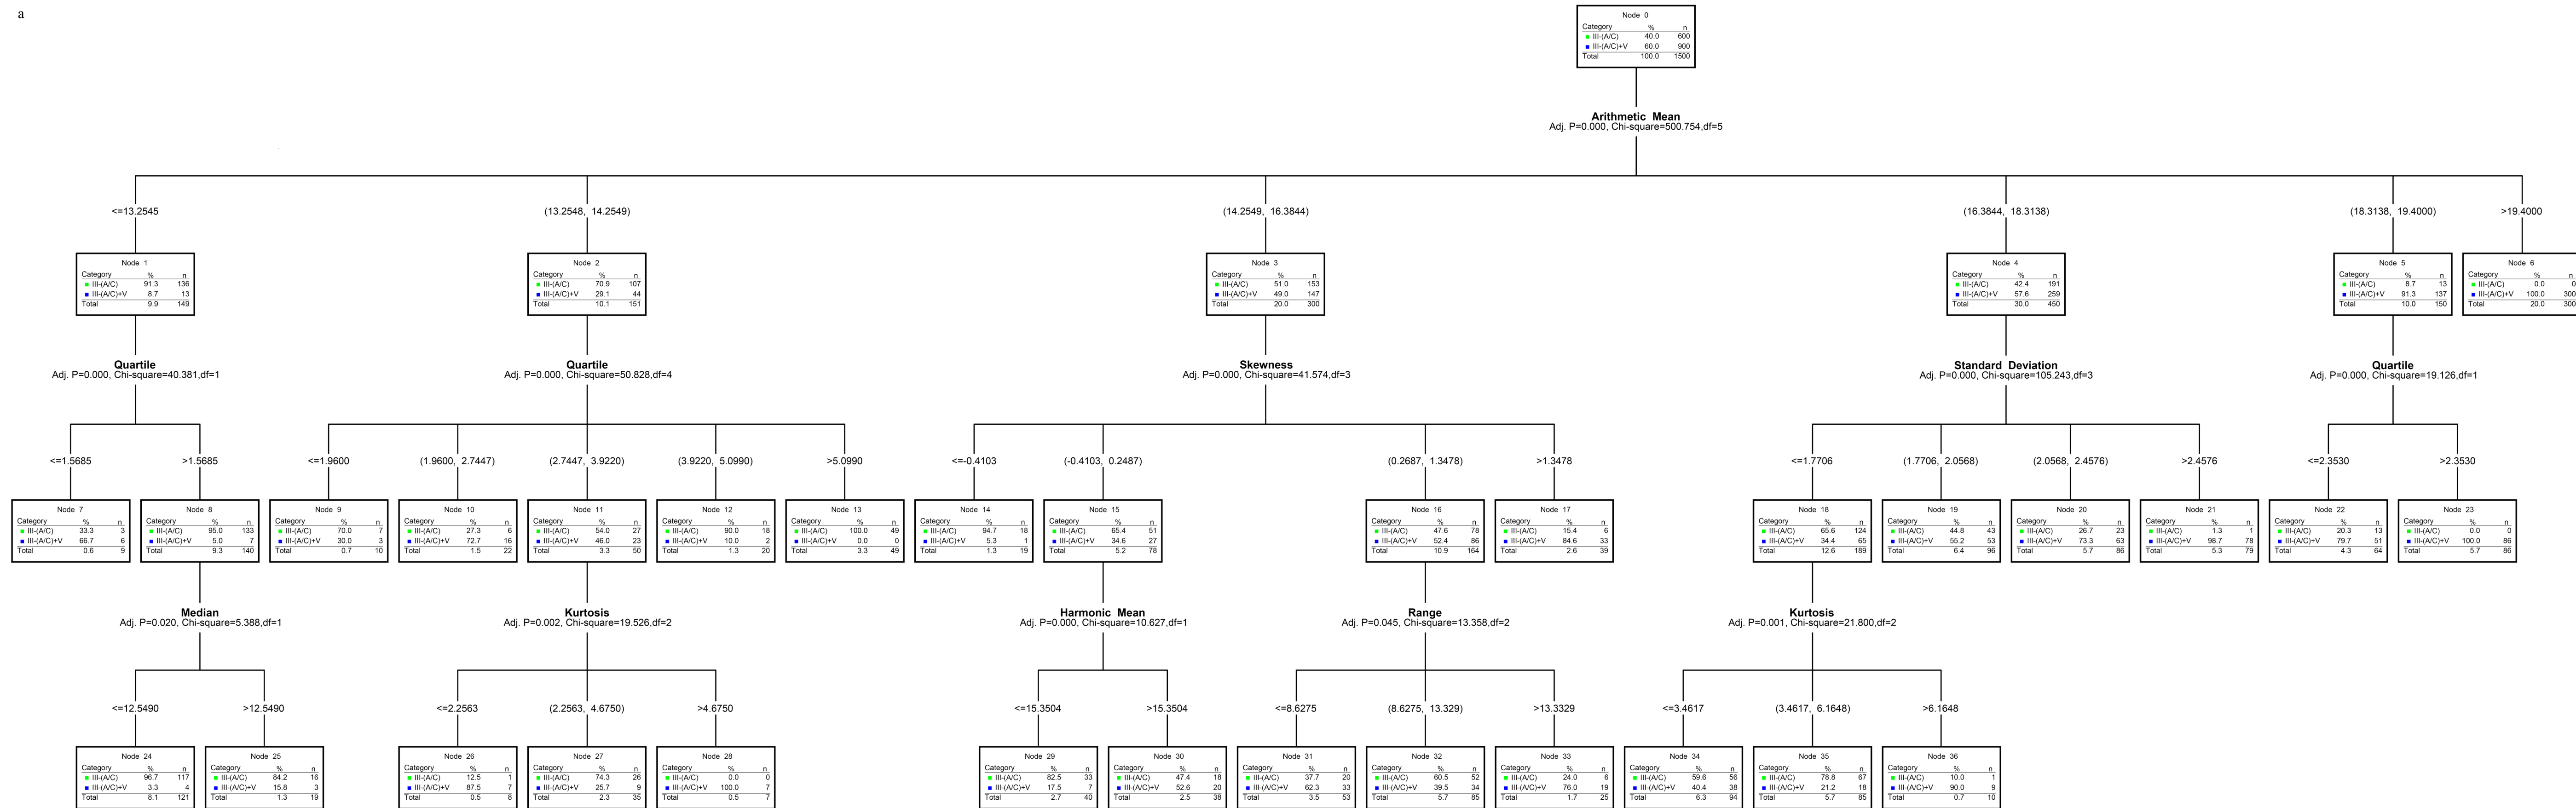

b

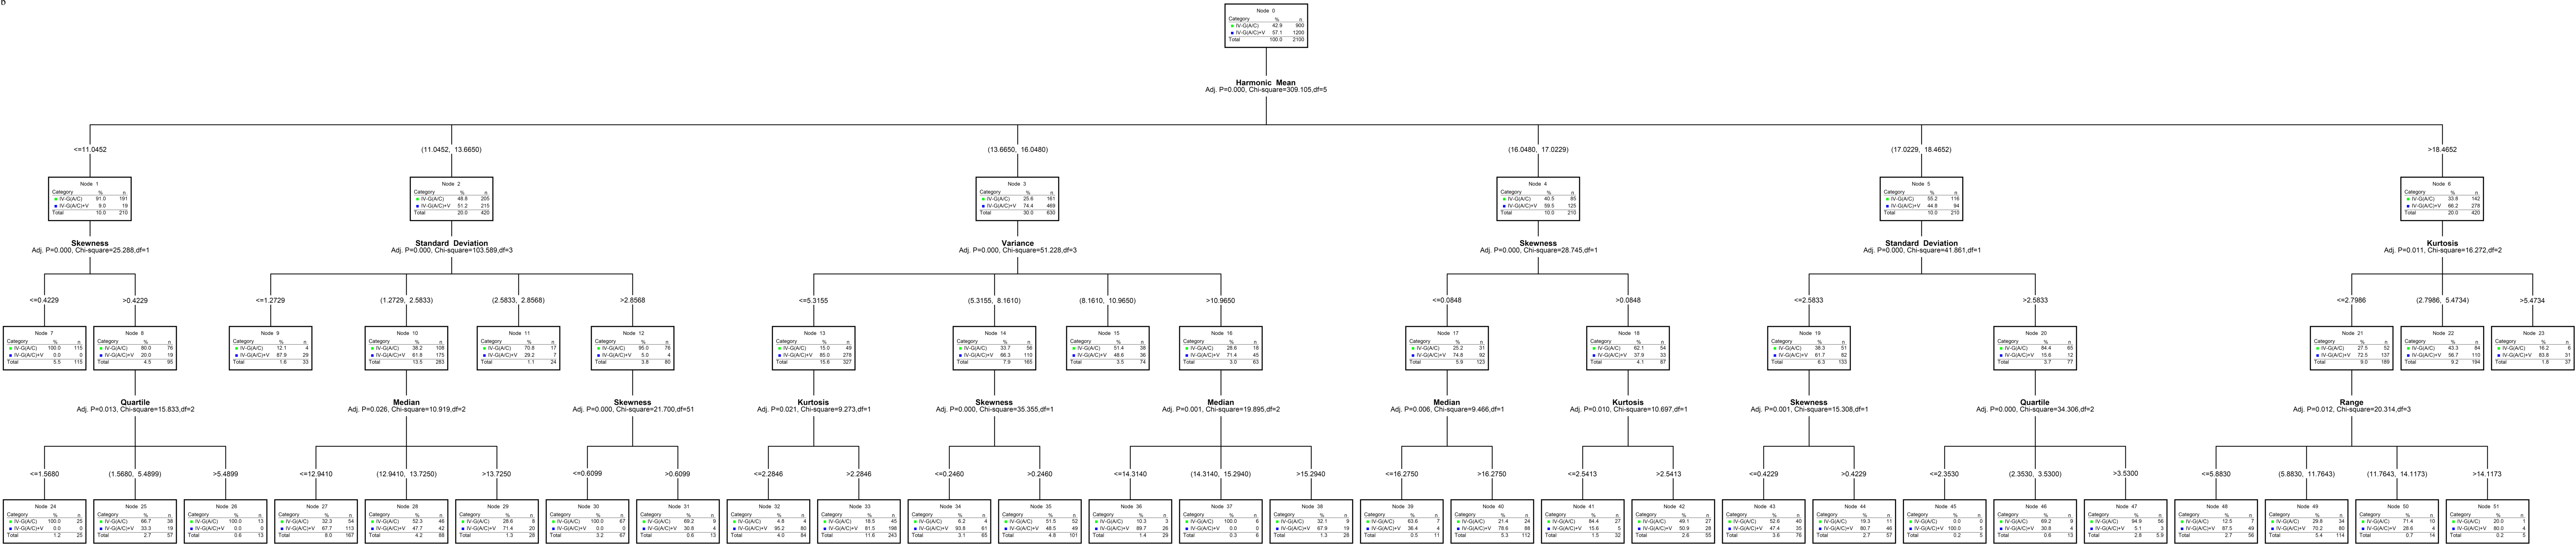

Supplement: MOESM3 [file 15455132]
